# Supplementary material for: Association and Mutation Analyses of 16p11.2 Autism Candidate Genes
Source: PLoS One. 2009 Feb 26;4(2):e4582. doi: 10.1371/journal.pone.0004582 (PMC2644762; doi:10.1371/journal.pone.0004582)
Supplement: Table S3 — Complete summary of exonic and promoter variants identified in autism (0.04 MB XLS) [file pone.0004582.s003.xls]

## Sheet: Table
Table S3. Complete summary of exonic and promoter variants identified in autism
Gene	Blood ID	Family ID	Sex	Racea	Ethnicty	Locationb	Amino Acidc	Nucleotided	Genotypee	Chromosomeg	Conservationh	Protein Predictioni	Transmission	Autism Frequencyk	Control Frequencyk	Sibling Statusl	Sequence Context
ALDOA	60536	SK0123-004	M	White	Jewish	5' UTR	na	123244G>A	Het	chr16:29974016	conserved	na	Inherited - Maternal	1/86	0/92	Present in one affected and two of three unaffected siblings	TGCGCGGACG[G/A]TAGCTCCCCC
DOC2A	HI0356	AU0227-04	M	White	Not hispanic or Latino	Pro2	na	77883G>A	Hom	chr16:29930371	not conserved	na	Undetermined	1/85	0/89	nd	ACGCGCGGGG[G/A]TGGGGGGAGA
DOC2A	HI0112	AU0289-03	M	White	Hispanic or Latino	Exon 6	M225I	82362G>A	Het	chr16:29925892	highly conserved	Possibly damaging	Inherited - Paternal	1/176	0/258	Present in affected sibling and absent in unaffected sibling	CCTCTTCCAT[G/A]TCAGCGGCGC
DOC2A	HI0197	AU0037-05	M	White	Not Hispanic or Latino	Exon 7	R266Q	82566G>A	Het	chr16:29925688	not conserved	Benign	Inherited - Paternal	1/176	0/258	Present in unaffected sibling and absent in NQA sibling	TCGCGGCGCC[G/A]GGGACTGCTG
HIRIP3	HI0414	AU0095-04	M	Black/AA	Unknown	Pro2	na	92636G>A	Het	chr16:29915618	highly conserved	na	Inherited - Paternal	1/91	0/93	Absent in affected sibling	TGAGGGGAGG[G/A]AAGGAGACAC
HIRIP3	HI0105	AU0259-03	M	White	Hispanic or Latino	Pro5	na	93598T>C	Het	chr16:29914656	conserved	na	Undetermined	1/85	0/93	Present in affected sibling	ACGAGAACTT[T/C]TAAAATGATC
HIRIP3	71182	SK0273-003	M	White	Indian	Exon 5	R419C	61843C>T	Het	chr16:29912615	not conserved	Benign	Inherited - Maternal	1/179	0/183	Present in affected sibling	CTCAGGTCGC[C/T]GTGGAGAGGA
MAZ	HI0468	AU0427-04	M	Unknown	Unknown	Pro2	na	114496T>G	Het	chr16:29724343	conserved	na	Inherited - Maternal	1/92	0/90	Absent in NQA sibling and unaffected sibling	AATACACCGC[T/G]GGGGTGGGGC
PPP4C	HI0033	AU0264-05	F	White	Not hispanic or Latino	Pro2	na	14556T>C	Het	chr16:29993698	not conserved	na	Undeterminedj	1/92	0/90	Present in affected sibling and unaffected sibling	AATGGCACTC[T/C]TGACATTTCT
PPP4C	HI0289	AU0386-03	M	Unknown	Unknown	Pro2	na	14708T>C	Het	chr16:29993546	not conserved	na	Inherited - Maternal	1/92	0/90	Present in affected MZ twin	GCCTCCTGAA[T/C]AGCTGGGACT
MAPK3	HI0067	AU0137-05	F	White	Not Hispanic or Latino	Exon 2	V63M	133587G>A	Het	chr16:30040810	highly conserved	Benign	Inherited - Paternal	1/91	0/184	Present in unaffected sibling and absent in unaffected sibling and a broad spectrum sibling	CTATGACCAC[G/A]TGCGCAAGAC
SEZ6L2	HI0437	AU0164-03	M	White	Not hispanic or Latino	Pro3	na	62867G>A	Het	chr16:29818551	not conserved	na	Inherited - Paternal	1/91	0/91	Absent in affected sibling	GCTAATTACT[G/A]CTGGGACCAG
SEZ6L2	HI0545 HI0125	AU0148-03 AU0340-04	M F	White White	Not hispanic or Latino Not hispanic or Latino	Pro4	na	63078G>A 63078G>A	Het Hom	chr16:29818340	conserved	na	Inherited - Maternal Inherited - Maternal	2/86	0/86	Absent in affected sibling and unaffected sibling nd	TCCAGTGCCC[G/A]AGCTTCGGCT
SEZ6L2	HI2997	AU0938-301	M	White	Not Hispanic or Latino	Exon 2	E38E	64646G>A	Hemif	chr16:29816772	conserved	na	Inherited - Paternal	1/708	0/556	Absent in affected sibling	TATTGCCAGA[G/A]CCTGGAAGTG
SEZ6L2	HI0482	AU0190-03	M	White	Unknown	Exon 3	T77T	65494G>A	Het	chr16:29815924	not conserved	na	Inherited - Maternal	1/527	0/278	Present in MZ twin and absent in unaffected sibling	SGGACCCCAC[G/A]CTAGCCACCC
SEZ6L2	00C01306	60-2125-003	F	Unknown	Unknown	Exon 7	S396L	74926C>T	Het	chr16:29806492	conserved	Benign	Inherited - Paternal	1/1099	0/1152	Absent in affected sibling	GAAAGGGTCT[C/T]GCTGGATGAG
SEZ6L2	HI0785	AU0465-03	M	White	Not Hispanic or Latino	Exon 11	P588L	85179C>T	Het	chr16:29796239	conserved	Benign	Inherited - Maternal	1/527	0/278	Absent in two unaffected siblings and NQA sibling	GGGGACGGTC[C/T]CAGCGCCCGA
SEZ6L2	HI0049	AU0287-03	M	White	Not Hispanic or Latino	Exon 13	P724L	88933C>T	Het	chr16:29792485	highly conserved	Benign	Inherited - Paternal	1/527	0/554	-	GCCGGCTTCC[C/T]CGTTGGCTCC
SEZ6L2	HI2182	AU0798-03	F	White	Not Hispanic or Latino	Exon 13	L734Q	88963T>A	Het	chr16:29792455	conserved	Benign	Inherited - Paternal	1/527	0/554	Present in two affected siblings	TACCGCTGCC[T/A]GCCAGGGTAC
SEZ6L2	HI3156	AU1030-302	M	White	Hispanic or Latino	Exon 16	I887I	90367C>T	Het	chr16:29791051	not conserved	na	Inherited - Maternal	1/527	0/278	Absent in two affected siblings; unknownl in unaffected sibling	ACAGCCCCAT[C/T]ACCGTGGAGT
TAOK2	HI0317	AU0186-04	F	White	Not hispanic or Latino	Pro2	na	117019G>A	Het	chr16:29891235	not conserved	na	Undetermined	1/91	0/93	nd	CTACGTTTGT[G/A]AAGCTGATTC
TAOK2	HI0223 HI0085	AU0370-03 AU0162-04	M F	Multiple White	Not hispanic or Latino Hispanic or Latino	Pro2	na	117050G>A	Het	chr16:29891204	not conserved	na	Inherited - Maternal Inherited - Paternal	2/183	0/457	Absent in an affected sibling Present in affected sibling and absent in unaffected sibling	TCTTGTTAAC[G/A]GAATCAGCTT
TAOK2	HI0190	AU0043-04	M	NH/PI	Hispanic or Latino	Pro5	na	115685C>G	Het	chr16:29892569	conserved	na	Inherited - Maternal	1/91	0/93	Absent in affected sibling and unaffected sibling	GCCGCCAAGC[C/G]CGAGTGCGCG
TAOK2	HI0414	AU0095-04	M	Black/AA	Unknown	Pro5	na	115775G>A	Het	chr16:29892479	conserved	na	Inherited - Paternal	1/91	0/93	Absent in affected sibling	CCGGCACTCT[G/A]TCCCACGACT
TAOK2	65690	SK0256-003	M	Half/African	Somalian	Exon 14	A522T	104078G>A	Het	chr16:29904176	conserved	Benign	Undetermined	1/87	0/83	Present in affected sibling and absent in two affected siblings	GGAGCACAGT[G/A]CACGGCTGCA
aAA, African-American; Multiple, more than one race; NH/PI, Native Hawaiian or other Pacific Islander
b UTR, untranslated region; Pro, promoter (specific nucleotide position is specified in Table)
cPositions based on the following accession numbers: DOC2A (Q14183); HIRIP3 (Q9BW71); MAPK3 (P27361); SEZ6L2 (Q6UXD5); TAOK2 (Q9UL54)
dPositions based on the following accession numbers: ALDO, DOC2A, HIRIP3, and PPP4C (AC093512.2); MAZ (AC009133); MAPK3 (AC012645.7); SEZ6L2 (AC120114.2); TAOK2 (AC093512.2)
eHet, heterozygous; Hom, homozygous; Hemi, hemizygous
fThis patient harbors a 16p11.2 microdeletion
gBased on UCSC Genome Browser (http://genome.ucsc.edu/), Human March 2006 Assembly
hFour species were compared (human, rhesus macaque , mouse, and pufferfish (Fugu)). Conservation is described at the amino acid and nucleotide levels for coding and non-coding variants, respectively. Highly conserved, conserved across all four species; Conserved, conserved between human, rhesus, and
mouse; Not conserved, conserved only between human and macaque or human only
iBased on PolyPhen (http://genetics.bwh.harvard.edu/pph/)
jNot present in mother and father unavailable for typing
kNumber of individuals, not chromosomes
lNQA, not quite autism; MZ, monozygotic
lDNA unavailable for unaffected sibling
