# Supplementary material for: Association and Mutation Analyses of 16p11.2 Autism Candidate Genes
Source: PLoS One. 2009 Feb 26;4(2):e4582. doi: 10.1371/journal.pone.0004582 (PMC2644762; doi:10.1371/journal.pone.0004582)
Supplement: Table S6 — Inheritance and segregation analysis in patients with R386H (0.02 MB XLS) [file pone.0004582.s006.xls]

## Sheet: Sheet1
Table S6. Inheritance and segregation analysis in patients with R386H
Family-Individual	Patient ID	Sex	Ancestry	Genotype	Transmission	Family Type	Sibling Status
AU0187-04	HI0340	F	Caucasian	Het	Inherited; M	Multiplex	Present in an affected sibling
AU0022-04	HI0134	M	Caucasian	Het	Inherited; F	Multiplex	Present in an affected sibling but not in an unaffected sibling
AU0037-05	HI0197	M	Caucasian	Het	Inherited; M	Multiplex	Not present in a sibling with NQA and an unaffected sibling
AU0027-04	HI0361	M	Caucasian	Het	Inherited; F	Multiplex	Present in an affected monozygotic twin with broad spectrum autism
AU0545-03	HI1004	M	Caucasian	Het	Inherited; M or F	Multiplex	Present in two affected siblings
AU0452-03	HI1591	M	Unknown	Het	Inherited; F	Multiplex	Not present in an affected sibling
AU0792-04	HI1934	M	Unknown	Het	Inherited; M	Multiplex	Present in an affected MZ twin and absent in an unaffected sibling
AU1391-301	HI3544	F	Caucasian	Het	Inherited; M	Multiplex	Absent in an affected sibling and present in an unaffected sibling
AU1227-304	HI4594	M	Caucasian	Het	-	Multiplex	-
AU1462-302	HI3873	F	Caucasian	Het	Inherited; M	Multiplex	Absent in an NQA sibling and present in an unaffected sibling
-	00C03212		Caucasian	Het	-	-	-
-	01C05707		Caucasian	Het	-	-	-
NQA, not quite autism
-, data unavailable
