# Supplementary material for: Association and Mutation Analyses of 16p11.2 Autism Candidate Genes
Source: PLoS One. 2009 Feb 26;4(2):e4582. doi: 10.1371/journal.pone.0004582 (PMC2644762; doi:10.1371/journal.pone.0004582)
Supplement: Table S8 — PCR primers used to amplify candidate genes on 16p11.2 (0.11 MB XLS) [file pone.0004582.s008.xls]

## Sheet: Sheet1
Table S8. PCR primers used to amplify candidate genes on 16p11.2
		Forward			Reverse		Amplicon Size
Gene	Regiona	Assay	Sequence		Assay	Sequence		RefSeq ID	Chromosome 16 Coordinates	Ta (°C)
ALDOA	Promoter 2	oRAK428	5'-TGAGGAATTCAAGTATCTTGTGAG-3'		oRAK429	5'-GACAGATTTTCGCTCATCTCC-3'	669	NM_000034.2	chr16:29970518-29971186	55°
ALDOA	Promoter 3	oRAK430	5'-GTGGCAGTCGCCTGTAATCT-3'		oRAK431	5'-ATCAGATGCCGGACGTTG-3'	690	NM_000034.2	chr16:29971054-29971743	52°
ALDOA	Promoter 4	oRAK432	5'-TTCTCCCTTTTGCAGATGCT-3'		oRAK433	5'-CCTCCTCAGTCCCCACACT-3'	473	NM_000034.2	chr16:29971618-29972090	55°
ALDOA	Exon 1, 2	oRAK354	5'-TACAAACACCGCTCTGGTCA-3'		oRAK355	5'-CTGGAAGACAGGCCCATTC-3'	487	NM_000034.2	chr16:29971909-29972395	55°
ALDOA	Exon 3	oRAK356	5'-ATCTGGTGGCCGTTCCTC-3'		oRAK357	5'-CGGATAGATGCAAGGGCTAA-3'	373	NM_000034.2	chr16:29973497-29973869	55°
ALDOA	Exon 4	oRAK358	5'-CCCTTGCATCTATCCGTTTT-3'		oRAK359	5'-GCCTTGAGAAGGTGCTCAGT-3'	402	NM_000034.2	chr16:29973854-29974255	55°
ALDOA	Exon 5	oRAK360	5'-ATTTCCCAGGCCTCTCTGTT-3'		oRAK361	5'-CTCTCTTTTCTGGCCCTCCA-3'	420	NM_000034.2	chr16:29982460-29982879	55°
ALDOA	Exon 5, 6	oRAK362	5'-CTGCAGGGCAGGACTCTT-3'		oRAK363	5'-AAGCCCCTGACATTCACACT-3'	610	NM_000034.2	chr16:29982819-29983428	55°
ALDOA	Exon 7, 8	oRAK364	5'-GAACATTTCCCTGACCTCCA-3'		oRAK365	5'-CATTCATTCCCTGCCTCACT-3'	606	NM_000034.2	chr16:29985959-29986564	55°
ALDOA	Exon 9, 10	oRAK366	5'-TGGAAAGGGTGCTAGAGGTC-3'		oRAK367	5'-CAACAGCCCTTGAGTGTCCT-3'	533	NM_000034.2	chr16:29987409-29987941	55°
ALDOA	Exon 11, 12	oRAK368	5'-GAGTCCCTGGCATCATCAAG-3'		oRAK369	5'-GGTTGTGGGTGGAGCTTATC-3'	530	NM_000034.2	chr16:29988021-29988550	55°
ALDOA	Exon 13, 14	oRAK370	5'-ATTTCCATGGCAACTTCCAC-3'		oRAK371	5'-CCGCTTAATAGGCGTGGTTA-3'	470	NM_000034.2	chr16:29988569-29989038	55°
ALDOA	Exon 14	oRAK372	5'-GAAGAGCCCTTCTCACTCCA-3'		oRAK373	5'-TTTCTTCTTCTGGGCTCTGC-3'	408	NM_000034.2	chr16:29988902-29989309	55°
DOC2A	Promoter 1	oRAK302	5'-TGGAACTCCCTGCTGGTG-3'		oRAK303	5'-TTCAGGCCTCTCTCCTTGTG-3'	585	NM_003586	chr16:29930593-29931177	55°
DOC2A	Promoter 2	oRAK304	5'-TGAGACCTTCAGAGCCAAGC-3'		oRAK305	5'-GAGAACTTCGCACACACACG-3'	594	NM_003586	chr16:29930155-29930748	52°
DOC2A	Promoter 3	oRAK306	5'-CGTCGCCATGACAACGAG-3'		oRAK307	5'-CCTCTGCCTCCAACAGGTG-3'	629	NM_003586	chr16:29929724-29930352	52°
DOC2A	Promoter 4	oRAK308	5'-GTGCCCGGTTGGATGTGT-3'		oRAK309	5'-CTCCTGAGCCTGCCTGTC-3'	700	NM_003586	chr16:29929374-29930073	52°
DOC2A	Promoter 5	oRAK310	5'-CATCTGAGGCTGGGGTCTC-3'		oRAK311	5'-CTGGATGTTGATGGTCATGC-3'	593	NM_003586	chr16:29929003-29929595	55°
DOC2A	Exon 1	oRAK85	5'-CTACATGCACAGCCAGCAG-3'		oRAK86	5'-AGTGAGGGCCCCACAGAC-3'	468	NM_003586	chr16:29928684-29929151	60°
DOC2A	Exon 2, 3, 4	oRAK83	5'-CGGGCTTAATGGGACATAGA-3'		oRAK84	5'-GAGACACACAGAGCCAGTGC-3'	740	NM_003586	chr16:29927727-29928466	58°
DOC2A	Exon 5, 6, 7	oRAK81	5'-GTGGAGGGAGACGAACTGAG-3'		oRAK82	5'-AGAGCTGGGCTGGTCCAAG-3'	697	NM_003586	chr16:29925511-29926207	55°
DOC2A	Exon 8, 9	oRAK79	5'-CCACCTCCCTGCCACTTG-3'		oRAK80	5'-TCCTGTTATCTGAAGGAGGTGA-3'	690	NM_003586	chr16:29925181-29925870	55°
DOC2A	Exon 10	oRAK77	5'-CCTCCTCTGAACCTCCCCTA-3'		oRAK78	5'-CTTCATTGGTGAGGGAGGAG-3'	596	NM_003586	chr16:29924647-29925242	58°
HIRIP3	Promoter 1	oRAK312	5'-CTGCCTCCAGGGTTCAAAT-3'		oRAK313	5'-AGCCCTTGGCCTCTTGTAAT-3'	597	NM_003609.2	chr16:29915913-29916509	60°
HIRIP3	Promoter 2	oRAK314	5'-GGGGTACGGCTGCTACTACA-3'		oRAK315	5'-AGGTACCCAGGAGGACA-3'	594	NM_003609.2	chr16:29915566-29916156	55°
HIRIP3	Promoter 3	oRAK316	5'-GAACCATGCTCTCCACCAAT-3'		oRAK317	5'-ACGGCGAAGTGGACTACAAA-3'	573	NM_003609.2	chr16:29915149-29915721	55°
HIRIP3	Promoter 4	oRAK318	5'-CAACGGTCCTCCGTGAAG-3'		oRAK319	5'-ATTTCGCAAGGCAGAAGAGA-3'	576	NM_003609.2	chr16:29914764-29915339	60°
HIRIP3	Promoter 5	oRAK320	5'-GGGACACTGGGACAGGAG-3'		oRAK321	5'-ACATGGTGTCAGGACGGAGT-3'	670	NM_003609.2	chr16:29914294-29914963	58°
HIRIP3	Exon 1	oRAK73	5'-GCACGATGGAATGCGTAAG-3'		oRAK74	5'-GGGACACTGGGACAGGAG-3'	701	NM_003609.2	chr16:29914263-29914963	55°
HIRIP3	Exon 2	oRAK71	5'-GTCAGGCCCCTCCTCCTC-3'		oRAK72	5'-GTTGGAGATGGGGTTGGA-3'	257	NM_003609.2	chr16:29914095-29914351	60°
HIRIP3	Exon 3	oRAK69	5'-CTAACGCCTGGGGACATAAG-3'		oRAK70	5'-GCTTGCTGCTGAGGAGGAG-3'	290	NM_003609.2	chr16:29913833-29914122	60°
HIRIP3	Exon 4.1	oRAK67	5'-TGTCTGAGTCTCCCAAGAGC-3'		oRAK68	5'-GAGGCAACCTATCCGAAGTG-3'	646	NM_003609.2	chr16:29913096-29913741	55°
HIRIP3	Exon 4.2	oRAK65	5'-AGCCTAGCAAGGAAAGAGCA-3'		oRAK66	5'-TCCTAGCCCAGAAGAAAGAGC-3'	648	NM_003609.2	chr16:29912628-29913275	60°
HIRIP3	Exon 5	oRAK63	5'-GGTACCTGGGGCAGAAGAAG-3'		oRAK64	5'-GGTGGGAGGCCACTATTAGG-3'	338	NM_003609.2	chr16:29912375-29912712	60°
HIRIP3	Exon 6	oRAK61	5'-GGAAAGGGGAAACGAGAGAT-3'		oRAK62	5'-GCTAGGCATGAAGGGTGAGG-3'	278	NM_003609.2	chr16:29912198-29912475	58°
HIRIP3	Exon 7	oRAK59	5'-GGGGAAATTAAAGGGAACCA-3'		oRAK60	5'-CACTGCCCAGGAGCAGATAG-3'	553	NM_003609.2	chr16:29911712-29912264	53°
MAPK3	Promoter 1	oRAK322	5'-CCACCACACCCAGCTCAT-3'		oRAK323	5'-GCCAGGCACTTTTGGTTTT-3'	545	NM_002746.2	chr16:30043563-30044107	60°
MAPK3	Promoter 2	oRAK324	5'-GCTGGCGCCTGTAATCCT-3'		oRAK325	5'-CCAGCATGGCTGCAGTAAA-3'	700	NM_002746.2	chr16:30043117-30043816	55°
MAPK3	Promoter 5	oRAK330	5'-AAGACACCATTTTGAGTCTCAGC-3'		oRAK331	5'-CCCTTCACCATCTCCACCT-3'	581	NM_002746.2	chr16:30041934-30042514	52°
MAPK3	Exon 1	oRAK103	5'-GTCTCCACGTCCCGGAAA-3'		oRAK104	5'-GAACCTGGGGCAAGAAGG-3'	450	NM_002746.2	chr16:30041767-30042216	55°
MAPK3	Exon 2	oRAK99	5'-GGTGGTGGGTAAGATGGAAA-3'		oRAK100	5'-CGGACTCCCCCTTTGTAAG-3'	331	NM_002746.2	chr16:30040550-30040880	58°
MAPK3	Exon 3	oRAK97	5'-TTGCTTGCAATGTTCTCCTG-3'		oRAK98	5'-CCTTCAGAGCCTGTTTTCCTT-3'	361	NM_002746.2	chr16:30037076-30037436	58°
MAPK3	Exon 4, 5	oRAK95	5'-CGTGGTGGTATCCCTGACTT-3'		oRAK96	5'-GGAACAGTGGAGGCAAAGAC-3'	670	NM_002746.2	chr16:30036404-30037073	55°
MAPK3	Exon 6, 7	oRAK93	5'-AGGTAGGTCATCCAGCTCCA-3'		oRAK94	5'-GGGTCTTGTTCTTGCCTTGT-3'	628	NM_002746.2	chr16:30035562-30036189	55°
MAPK3	Exon 8	oRAK91	5'-GCTGCTGTATGGAGGCATGT-3'		oRAK92	5'-CAGTCCCCAGCAGCAGTG-3'	352	NM_002746.2	chr16:30035358-30035709	60°
MAZ	Promoter 1	oRAK342b	5'-TTGCATAATAAGAATTAACCCAGA-3'		oRAK343b	5'-CTCCATCTGTTTCCCCGTTA-3'	524	NM_002383.2	chr16:29723461-29723984	55°
MAZ	Promoter 2	oRAK344b	5'-CCCTTCAGCCAGGTAGCA-3'		oRAK345b	5'-CCTCATGCTTCGGCTTCC-3'	568	NM_002383.2	chr16:29723837-29724404	52°
MAZ	Promoter 3	oRAK346b	5'-TTTTGCTCCGGTGCTTCC-3'		oRAK347b	5'-AGGACACACAAGAGGCTGGA-3'	600	NM_002383.2	chr16:29724195-29724794	55°
MAZ	Exon 1, 2	oRAK17	5'-AAGGCGCCCTCTTTTCCT-3'		oRAK18	5'-GAGCACCGGGAGCAAGTC-3'	532	NM_002383.2	chr16:29725343-29725874	55°
MAZ	Exon 3.1	oRAK19	5'-TCCATTCCAGGTGAGTAGGG-3'		oRAK20	5'-CACGCTCAGGAGGCTCAG-3'	616	NM_002383.2	chr16:29725706-29726321	55°
MAZ	Exon 3.2	oRAK21	5'-CGTCTGCCTTGGAGAAGAAG-3'		oRAK22	5'-ACACCGGGAGAAGCTCTTG-3'	518	NM_002383.2	chr16:29726137-29726654	55°
MAZ	Exon 4, 5	oRAK23	5'-CAGGGATCCTCGGAAAGG-3'		oRAK24	5'-TGGCTACAGCACCCTTAACC-3'	694	NM_002383.2	chr16:29726964-29727657	55°
MAZ	Exon 6	oRAK27	5'-GAAGCAGGCTGGGAAGGT-3'		oRAK28	5'-CCAGGGGACTTCAACACAAC-3'	484	NM_002383.2	chr16:29728815-29729298	55°
PPP4C	Promoter 1	oRAK332	5'-AAAATCGCTCCACTGCACTC-3'		oRAK333	5'-CCAAAATGGCACTCTTGACA-3'	599	NM_002720.1	chr16:29993114-29993712	60°
PPP4C	Promoter 2	oRAK334	5'-TGGCTAACACGGTGAAACC-3'		oRAK335	5'-GGGGCTAGGCTTTGTAACTT-3'	696	NM_002720.1	chr16:29993395-29994090	60°
PPP4C	Promoter 3	oRAK336	5'-GCCAGGCCTTATTCTAACCA-3'		oRAK337	5'-CGGGTTCCAGCAATTCTC-3'	598	NM_002720.1	chr16:29993891-29994488	55°
PPP4C	Promoter 4	oRAK338	5'-TATGATAGCCCCACCGACTC-3'		oRAK339	5'-TCTTTCACTCCGCTTTCGAC-3'	681	NM_002720.1	chr16:29994192-29994872	55°
PPP4C	Promoter 5	oRAK340a	5'-TCTCAGGCTGGAGAAGTGGT-3'		oRAK341a	5'-CCTTGACTTCGCTCTCCTTG-3'	569	NM_002720.1	chr16:29994710-29995278	52°
PPP4C	Exon 1	oRAK177	5'-GGGGCCGGAAGTAGGAG-3'		oRAK178	5'-AGCCCAAAGTTCTCAGTTGG-3'	571	NM_002720.1	chr16:29994813-29995383	55°
PPP4C	Exon 2	oRAK179	5'-TCCAGGACTGCCTCATATCC-3'		oRAK180	5'-CCCCAAGATGAAGAGGAAAC-3'	222	NM_002720.1	chr16:29999983-30000204	55°
PPP4C	Exon 3, 4	oRAK181	5'-ACTAAAGCAGCGGGTGTTTG-3'		oRAK182	5'-TCACGATAGGAGATGAGGGC-3'	533	NM_002720.1	chr16:30001225-30001757	58°
PPP4C	Exon 5, 6	oRAK183	5'-CAGTGGTTGTGAGGATGGC-3'		oRAK184	5'-AGGTGGAGGACGAGTGACAG-3'	586	NM_002720.1	chr16:30002114-30002699	58°
PPP4C	Exon 7	oRAK185	5'-TCACCCTCAAGGGGCAG-3'		oRAK186	5'-CACATTCCCACAGCTGGAAG-3'	355	NM_002720.1	chr16:30003413-30003767	60°
PPP4C	Exon 8	oRAK187	5'-GCACCCAACTACTGCTACCG-3'		oRAK188	5'-GACGTCCACCCCAGGTC-3'	609	NM_002720.1	chr16:30003658-30004266	58°
SEZ6L2	Promoter 1	oRAK342a	5'-GACCCCAGTTCCCCTGTC-3'		oRAK343a	5'-CAGGAAGGAGCGAGTAGGAG-3'	552	NM_201575.2	chr16:29819402-29819953	55°
SEZ6L2	Promoter 2	oRAK344a	5'-GTTCCTACCCTGCCTGGAC-3'		oRAK345a	5'-GAGCGCCCTTTTCAGCAC-3'	682	NM_201575.2	chr16:29818890-29819571	52°
SEZ6L2	Promoter 3	oRAK346a	5'-AGAAGGGGCGGGTCGTAT-3'		oRAK347a	5'-TAGGGGAGGCAAAGGAAACT-3'	673	NM_201575.2	chr16:29818519-29819191	55°
SEZ6L2	Promoter 4	oRAK348a	5'-TGTCACAATCGTGGAAGCTC-3'		oRAK349a	5'-CTAGGGGACTGGGGAGGAG-3'	576	NM_201575.2	chr16:29818203-29818778	58°
SEZ6L2	Promoter 5	oRAK340b	5'-CTCCAGTGCCCGAGCTTC-3'		oRAK341b	5'-TCAGCAGAATTAGGAACAGCA-3'	571	NM_201575.2	chr16:29817781-29818351	58°
SEZ6L2	Exon 1	oRAK57	5'-CCCATGTGCTCGGAAGAC-3'		oRAK58	5'-ACAGAGCCGCGAGAAGAG-3'	420	NM_201575.2	chr16:29817664-29818083	55°
SEZ6L2	Exon 2	oRAK55	5'-CTGCCTGCTCTTCTCTAGCC-3'		oRAK56	5'-TGGAGGAGGGAGGAAGAGTT-3'	316	NM_201575.2	chr16:29816582-29816897	58°
SEZ6L2	Exon 3	oRAK53	5'-CCAGGACTCCTTCCACAGTT-3'		oRAK54	5'-GAACCCCTAGCTTCCCTCAG-3'	486	NM_201575.2	chr16:29815545-29816030	55°
SEZ6L2	Exon 4	oRAK239	5'-GAGATGAAGGCCAGAGTTGC-3'		oRAK240	5'-CTGTGTGTAGCAGCCCAAAA-3'	400	NM_201575.2	chr16:29814363-29814762	55°
SEZ6L2	Exon 5	oRAK241	5'-CTGCTACACACAGGGCAAAG-3'		oRAK242	5'-CCTGTGCTTCGATGGTTCTT-3'	694	NM_201575.2	chr16:29813682-29814375	55°
SEZ6L2	Exon 6	oRAK47	5'-CGAGATAGGACCCTCCCAAT-3'		oRAK48	5'-AGGTTGGCCTGAAAGGAGAG-3'	350	NM_201575.2	chr16:29807296-29807645	58°
SEZ6L2	Exon 7	oRAK45	5'-TTCTGACCCAAGACCCAGAC-3'		oRAK46	5'-CCGAGGAGAAGGACAGTTCA-3'	254	NM_201575.2	chr16:29806445-29806698	55°
SEZ6L2	Exon 8	oRAK43	5'-AGGCATAGAGTTTGTGCTTCC-3'		oRAK44	5'-AAGTTAGGAAAGCAGGCAAGG-3'	332	NM_201575.2	chr16:29804317-29804648	55°
SEZ6L2	Exon 9	oRAK41	5'-GATGTGCAGCCTTCCTTTCT-3'		oRAK42	5'-CCCACATCCCCAATTTAAGA-3'	367	NM_201575.2	chr16:29798591-29798957	55°
SEZ6L2	Exon 10	oRAK39	5'-CAGACAGGCTCAGAATGCAG-3'		oRAK40	5'-TCACGAGTGGTGAGGACTGT-3'	308	NM_201575.2	chr16:29797019-29797326	55°
SEZ6L2	Exon 11	oRAK37	5'-CGGGATAACAGGCGTGAG-3'		oRAK38	5'-GGGCTACCAATGAGCAGAGT-3'	384	NM_201575.2	chr16:29795999-29796382	55°
SEZ6L2	Exon 12	oRAK35	5'-GATGGAACCCAGAAAGCAC-3'		oRAK36	5'-AGGGGGCACAGAGCAAAG-3'	380	NM_201575.2	chr16:29795478-29795857	55°
SEZ6L2	Exon 13, 14	oRAK33	5'-GTCGCCCATTGGTCTCAAAT-3'		oRAK34	5'-TTTGTAGAGATGGGGTCTCTCTG-3'	668	NM_201575.2	chr16:29791968-29792635	55°
SEZ6L2	Exon 15, 16	oRAK31	5'-TCCCAAGACAGAGATTCCAGA-3'		oRAK32	5'-CTGGCTCAGACCCCATCC-3'	690	NM_201575.2	chr16:29790916-29791605	55°
SEZ6L2	Exon 17	oRAK29	5'-CTCCAGAGAAGTGGTCCAGTG-3'		oRAK30	5'-TTAAAACCCAGGATCGTTGC-3'	718	NM_201575.2	chr16:29789925-29790642	55°
TAOK2	Promoter 1	oRAK434	5'-GGGACTGGGAACAATTTGAC-3'		oRAK435	5'-GGGTATTGGAATTTCAGGACAA-3'	500	NM_004783.2	chr16:29890547-29891046	52°
TAOK2	Promoter 2	oRAK436	5'-TCCAAGCATTTGGGTAACAA-3'		oRAK437	5'-CCCCTCTGACAAGTGAAGATTT-3'	398	NM_004783.2	chr16:29890941-29891338	55°
TAOK2	Promoter 3	oRAK438	5'-AAAAGCTGATTCCGTTAACAAG-3'		oRAK439	5'-GGCCCAAGAAGTTGATTCAC-3'	602	NM_004783.2	chr16:29891192-29891793	55°
TAOK2	Promoter 4	oRAK440	5'-CCTTCCTCAATTTCTGCACAC-3'		oRAK441	5'-AGGCGGGAAAATAGACTGCT-3'	608	NM_004783.2	chr16:29891688-29892295	55°
TAOK2	Promoter 5	oRAK442	5'-GATTTGACCGATTGAGTTTTCC-3'		oRAK443	5'-CCCTCTCTGCCTCTCCTCTT-3'	608	NM_004783.2	chr16:29892185-29892792	52°
TAOK2	Exon 1.1	oRAK374	5'-CGGTCTCCATCTTGGAATTG-3'		oRAK375	5'-AATGAACCCCGGATACTGGT-3'	472	NM_004783.2	chr16:29892686-29893157	55°
TAOK2	Exon 1.2	oRAK376	5'-CCCGGGTAACAGTCCTCATA-3'		oRAK377	5'-CTGAGAGGGCCTACCCAAGT-3'	541	NM_004783.2	chr16:29893027-29893567	55°
TAOK2	Exon 2	oRAK378	5'-CCTCCTCCTCATCAGGGAAT-3'		oRAK379	5'-CAGCAAGAGAAGGCAGGAAA-3'	395	NM_004783.2	chr16:29896449-29896843	55°
TAOK2	Exon 3, 4	oRAK380	5'-GCCCTTGCACACTACTCCAT-3'		oRAK381	5'-CGAACAGGGACCACCTAAGA-3'	470	NM_004783.2	chr16:29896794-29897263	55°
TAOK2	Exon 5, 6	oRAK382	5'-CCGGGGACATAGCTTGAGTA-3'		oRAK383	5'-GACAGGTGGTGCAGATAGCA-3'	421	NM_004783.2	chr16:29897526-29897946	55°
TAOK2	Exon 7, 8	oRAK384	5'-TGCACCACCTGTCACTTAGC-3'		oRAK385	5'-TCACAACGGACAGGAACTTG-3'	520	NM_004783.2	chr16:29897934-29898453	55°
TAOK2	Exon 9, 10	oRAK386	5'-GCAACAGGATGATGGGAACT-3'		oRAK387	5'-AGGAGGAACTGGGAACCACT-3'	516	NM_004783.2	chr16:29900339-29900854	55°
TAOK2	Exon 11	oRAK388	5'-GGGATAAGGCCAGCATCAAC-3'		oRAK389	5'-GGGCATATGCATGGAGGTAG-3'	426	NM_004783.2	chr16:29901423-29901848	55°
TAOK2	Exon 12	oRAK390	5'-GCCCTACTCACACCACCATC-3'		oRAK391	5'-TGGGTCCAAAGAGAGCTACC-3'	483	NM_004783.2	chr16:29901801-29902283	55°
TAOK2	Exon 13	oRAK392	5'-CTGATTGGCTGTCCTCAGGT-3'		oRAK393	5'-ATCCAGACTCAATCCCATGC-3'	342	NM_004783.2	chr16:29902247-29902588	55°
TAOK2	Exon 14	oRAK394	5'-TTGAAAACCCATGCTCTTCC-3'		oRAK395	5'-GAGTGCTGGGGTTCTCCTG-3'	564	NM_004783.2	chr16:29903941-29904504	55°
TAOK2	Exon 15	oRAK396	5'-GCAAGGAACAGCTGAAGGAG-3'		oRAK397	5'-GGGCCAAGGAGAAAGAAGAC-3'	402	NM_004783.2	chr16:29904381-29904782	55°
TAOK2	Exon 16	oRAK398	5'-CTGTGTTTCTTCCGCCATC-3'		oRAK399	5'-GAGCAGGGCTGCTGTTCTAT-3'	441	NM_004783.2	chr16:29904984-29905424	55°
TAOK2	Exon 17	oRAK400	5'-TTTCCCCTGGTTGTTCCTC-3'		oRAK401	5'-TGCACCGTCCATTTCTCTAA-3'	381	NM_004783.2	chr16:29908323-29908703	55°
TAOK2	Exon 18	oRAK402	5'-ACCTGGGGGATAGATTCTGC-3'		oRAK403	5'-GCATCCGGAACAGAGGTTAG-3'	436	NM_004783.2	chr16:29909428-29909863	55°
TAOK2	Exon 19.1	oRAK404	5'-CTAACCTCTGTTCCGGATGC-3'		oRAK405	5'-CACATTCTCACTGCCACTGC-3'	454	NM_004783.2	chr16:29909844-29910297	55°
TAOK2	Exon 19.2	oRAK406	5'-CTGGCGTCAGCCGTCTCT-3'		oRAK407	5'-CCAGCCCCAAGAAGCTCAT-3'	410	NM_004783.2	chr16:29910138-29910547	55°
TAOK2	Exon 19.3	oRAK408	5'-GGCGATAGGTGCCTCAAG-3'		oRAK409	5'-AAAACACAAGCAGTACTATTCAGTGG-3'	592	NM_004783.2	chr16:29910569-29911160	55°
F-sequencing tail	5'-TGTAAAACGACGGCCAGT-3'
R-sequencing tail	5'-CAGGAAACAGCTATGAC-3'
The following promoter regions were unamplificable: ALDOA:chr16:29969949-29970640; MAPK3:chr16:30042715-30043301 and chr16:30042361-30042958; MAZ: chr16:29724622-29725019, chr16:29724773-29725368 and
chr16:29724965-29725553
